# Supplementary material for: Alleviation of nitrogen stress in rice (Oryza sativa) by ceria nanoparticles
Source: Royal Society of Chemistry journal article supplement (doi:10.1039/d0en00757a), 2020-01-01
Supplement: d0en00757a1.pdf [file d0en00757a1.pdf]

## Supporting Information

### Alleviation of Nitrogen Stress in Rice (*Oryza sativa*) by Cerium Nanoparticles

*Yaoyao Wang*<sup>1,#</sup>, *Peng Zhang*<sup>2,,#,\*</sup>, *Mingshu Li*<sup>1</sup>, *Zhiling Guo*<sup>2</sup>, *Sami Ullah*<sup>2</sup>, *Yukui Rui*<sup>1,\*</sup>,  
*Iseult Lynch*<sup>2</sup>

<sup>1</sup>Beijing Key Laboratory of Farmland Soil Pollution Prevention and Remediation, College of Resources and Environmental Sciences, China Agricultural University, Beijing 100193, China

<sup>2</sup>School of Geography, Earth and Environmental Sciences, University of Birmingham, Edgbaston, B15 2TT Birmingham, United Kingdom

# The two authors contributed equally.

Corresponding authors: [p.zhang.1@bham.ac.uk](mailto:p.zhang.1@bham.ac.uk) (P.Z.); [ruiyukui@163.com](mailto:ruiyukui@163.com) (Y. R.)

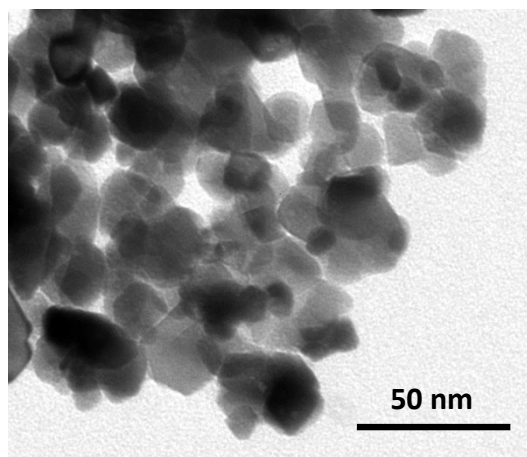

**Figure S1.** TEM images of CeO<sub>2</sub> NPs. The primary size obtained from the image is  $23.5 \pm 6.7$  nm.

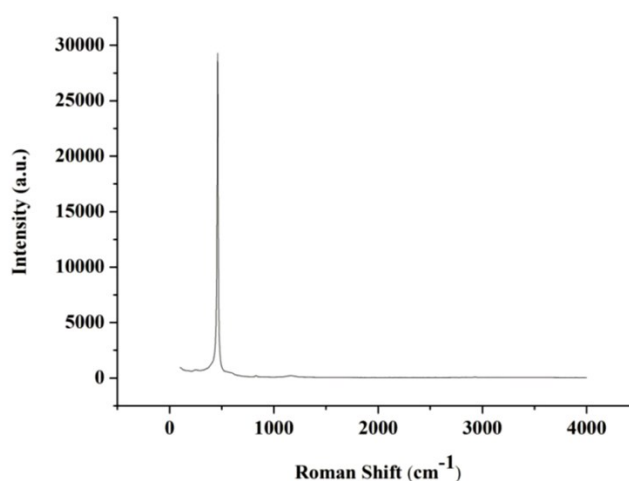

**Figure S2.** Raman spectra of CeO<sub>2</sub> NPs. The Raman shift at  $465 \text{ cm}^{-1}$  is assigned to the F2g band from Fm $\bar{3}m$  group of a cubic fluorite structure.

**Table S1.** Zeta potential and hydrodynamic size of CeO<sub>2</sub> NPs (100 mg/L) in deionized water and nutrient solution. The lowercase letters were used to show the significant difference ( $p < 0.05$ ).

| CeO <sub>2</sub> suspension | Zeta potential (mV ) | Diameter (nm)  |
|-----------------------------|----------------------|----------------|
| in nutrient solution        | $-14.7 \pm 1.2^a$    | $559 \pm 45^a$ |
| in deionized water          | $-12.3 \pm 1.7^a$    | $520 \pm 39^a$ |
